# Supplementary material
Source: PubMed Central journal article supplement (PMC6768640)

## SUPPORTING INFORMATION

*Hayward et al*

### ANKRD9 IS A METABOLICALLY-CONTROLLED REGULATOR OF IMPDH2 ABUNDANCE AND MACRO-ASSEMBLY

#### LEGENDS FOR SUPPORTING FIGURES 1-7

##### **Figure S1: ANKRD9 and IMPDH2 interact in rods**

HeLa cells were transfected with WT-FLAG ANKRD9 and subjected to 48 hours of 0.1% FBS. Cells were then homogenized and centrifuged at the indicated speeds. Cells were spun at 500xg for 5 minutes, 6000xg for 15 minutes, and 10000xg for 30 minutes and samples from the supernatant (S) and pellet (P) were taken for western blot analysis. The FLAG-ANKRD9 and IMPDH2 positive bands appear in the 500xg and 6000xg pellet fraction, typically referred to as the nuclear and mitochondrial fraction. Sedimentation of 35 kDa FLAG-ANKRD9 and 55kDa IMPDH2 in these heavy fractions is consistent with FLAG-ANKRD9 and IMPDH2 interactions in large macromolecular complex, as rods. The representative image from three independent experiments.

##### **Figure S2: Serum re-addition partially reverses ANKRD9 rod formation (a) and copper chelation does not trigger transition of ANKRD9 to rods (b).**

**(a)** HeLa cells were transfected with FLAG-tagged ANKRD9 and incubated under nutrient limiting conditions (0.1% FBS) for 24 hours, then cells growth medium was replaced with the medium containing 10% FBS. Cells were incubated for another 24 hours and then immuno-stained for FLAG. The 24 hours nutrient limitation induces ANKRD9 transition from vesicle-like structures to rods in approximately 50% of the cells (see Fig. 2 in the text). Placing cells in 10% serum for 24 hours partially reverses this phenotype (i.e some cells still have ANKRD9 in rods (long and short) and other cells show mostly punctate/vesicle-like pattern. N = 2. Scale bar 20  $\mu$ M. **(b)** HeLa cells were transfected with FLAG-ANKRD9 and incubated with 10 mM of intracellular copper chelator TTM for 48 hours in 10% FBS for 48 hours to limit copper availability. This treatment does not trigger conversion of ANKRD9 to rods. N = 3. Scale bar 20  $\mu$ M.

##### **Figure S3: ANKRD9 R125A mutant does not show a vesicle-like pattern**

**(a)** Sequence alignment of ANKRD9 orthologues with the CysCys motif high-lighted in yellow and the conserved arginine (Arg125 in human ANKRD9) highlighted in cyan; **(b)** ANKRD9 model (left panel) and a close-up view (right panel) of the locations of Cys109, Cys110, and Arg125 residues **(b)** HeLa cells were transfected with FLAG-ANKRD9 containing a point mutation at Arg125 in basal medium (10% FBS) and stained for FLAG and IMPDH2. ANKRD9 does not show the vesicle-like pattern observed for wt ANKRD9 (see Fig. 1 of main text) and does not appear to diminish IMPDH2 staining. **(c)** Western blot analysis of the R125A mutant. HeLa cells transfected with FLAG-ANKRD9 R125A and WT as control were blotted for Na<sup>+</sup>/K<sup>+</sup> ATPase as a loading control and FLAG.

##### **Figure S4: Docking model of ANKRD9 and IMPDH2**

**(a)** The crystal structure of the protein IMPDH2 (PDB ID: 1nf7) has missed regions. These were 'repaired' using the homology modeling of the MOE program. To create a homology model, a full sequence of the protein was used. The inserted residues are colored in magenta. The MOE program created 10 pro-models. The final model was based on the best-scoring intermediate model. The scores include the RMSD of each intermediate model to the average position of all of the intermediate models; the electrostatic solvation energy<sup>1</sup>, a knowledge-based residue packing quality function and an estimation

of the effective atomic contact energy (ACE)<sup>2,3</sup>. **(b)** Two views of the chosen homology model are shown. **(c)** Using the Dock application of the Compute module in MOE, possible docking configurations between the homology model of IMPDH2 and ANKRD9 were found. *Upper panel:* the scoring function for various members of docking poses. The poses 14 and 45 have the same best score 5. At the same time the pose 14 has free energy -16.17 kcal/mole and pose 45 has free energy 21.55 kcal/mole. So the pose 45 was selected as a best docking configuration. *Bottom panel:* Conserved residues Pro103, Ser104, Cys109, Cys110, Arg155, Val156, Glu157 and Thr161 (highlighted) on the ANKRD9 protein were used to define the preferred region of docking. The search was restricted to 100 placements and the placement with the best score was selected (see Fig. 7a in main text). The best scoring configuration had 5 contacts between heavy atoms of conserved residues from ANKRD9 to the residues of the IMPDH2 protein. In the site of interest Cys109 hydrophobic atoms CB and CA interact with hydrophobic atom CG of Glu168 of IMPDH2 (3.0 and 3.10 angstroms, respectively). The backbone O atom of Cys109 interacts with positively charged atom NZ (3.31 angstroms) of Lys167. The hydrophobic atoms CA and SG of the second member of the CysCys motif—Cys110—interact with atoms CD and CE of Lys167.

**Figure S5: ANKRD9 is predicted to bind to the IMPDH2 regulatory domain in the vicinity of the GDP/GTP binding site.**

(a) Regulatory domains of IMPDH2 dimer (PDB ID 6I0M) are shown in green and blue, GTP is in red, the K<sup>167</sup>E<sup>168</sup>E<sup>169</sup> motif (that is predicted to interact with the ANKRD9 CysCys-containing loop, as indicated by the arrow) is colored in pink

**Figure S6: ANKRD9 and IMPDH2 interactions are specific**

(a) HeLa cells were transfected with FLAG-ANKRD9 and immune-stained for FLAG and CTPS2 under basal growth conditions (10% FBS). Expression of ANKRD9 does not alter CTPS2 pattern/abundance, in contrast to IMPDH2 (see Fig. 7b,d in main text) which is markedly diminished under the same conditions; n = 2. (b) HeLa cells were transfected with FLAG-ANKRD9, treated with 10 μM proteasome inhibitor MG132 for 4 hours and stained for FLAG and IMPDH2. The several images shown shows that MG132 restores IMPDH2 staining in cells with low/medium levels of ANKRD9; n = 3. Scale bar: 20 μM

**Figure S7: Recombinant ANKRD9 has vesicular-like pattern and decreases IMPDH2 staining in HEK293.** HEK293A cells were transfected with FLAG-ANKRD9 under basal (10% FBS) conditions and immuno-stained for FLAG and IMPDH2. Cells expressing ANKRD9 (red) lack IMPDH2 staining (green); n = 2. Scale bar: 20 μM.

**References for Figure S4**

1. Labute P. The generalized born / volume integral (GB/VI) implicit solvent model: Estimation of the free energy of hydration using London dispersion instead of atomic surface area. *J Comp Chem* 2008; **29**:1693–1698)
2. Miyazawa S, Jernigan RL; Estimation of effective inter-residue contact energies from protein crystal structures: Quasi-chemical approximation. *Macromolecules* 1985; **18**:534–552;
3. Zhang C, Vasmatzis G, Cornette JL, DeLisi C. Determination of atomic desolvation energies from the structures of crystalized proteins. *J Mol Biol* 1997; **267**:707–726.

Figure 1

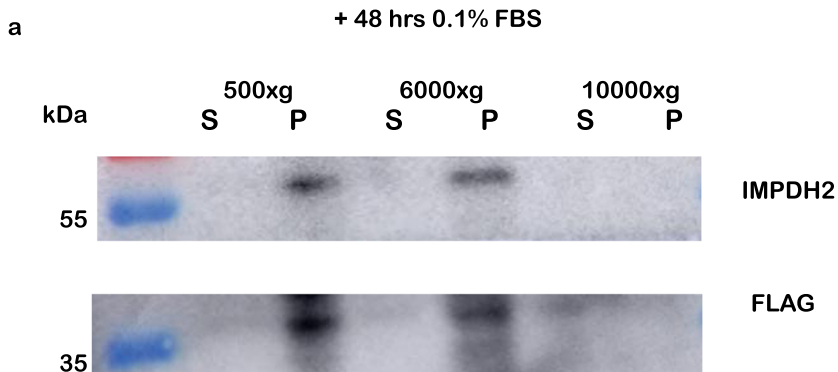

a

FLAG-ANKRD9: +24 hr 0.1% FBS, +24 hr 10% FBS

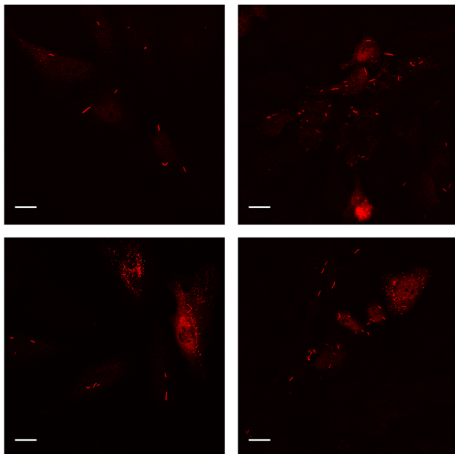

b

FLAG-ANKRD9: 10 micromolar TTM 48 hrs 10% FBS

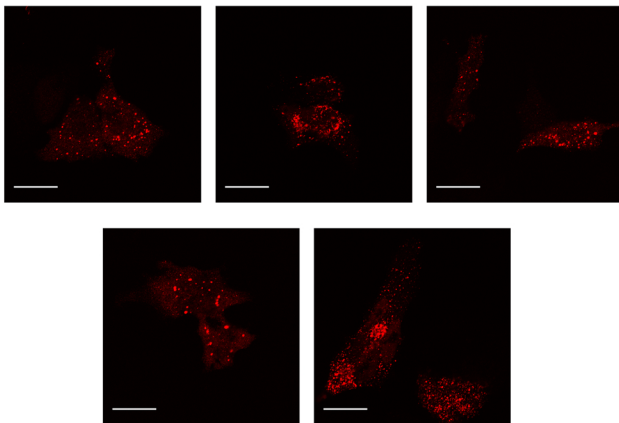

a

|                     |    |                  |      |                 |         |            |          |                 |     |
|---------------------|----|------------------|------|-----------------|---------|------------|----------|-----------------|-----|
| <i>H.sapiens</i>    | 93 | TFPRRALAPPSAGFR  | CC   | AAP-GPHVALAVRYN | RV      | GILRRILRTL | LRD      | FPA             | 141 |
| <i>B.taurus</i>     | 93 | TFPRRALAPPSAGFR  | CC   | AAP-GPHVALAVRYN | RY      | GILRRILRTL | VRD      | FPA             | 141 |
| <i>R.norvegicus</i> | 92 | TFPRRALAPPSAGFR  | CCT  | AP-GPHVALAVRYN  | RG      | ILRRILRTV  | QDF      | FPV             | 140 |
| <i>P.lepturus</i>   | 67 | KFPQSALAVPSQSFS  | CC   | QSS-APHLAMAVRYN | RV      | RILFRILKAI | QAF      | FPL             | 115 |
| <i>D.rerio</i>      | 84 | LFSSRALEMPRSFC   | CC   | QASTAPHL        | SI      | AVRYN      | RI       | NILKMMMETIKELAD | 132 |
| <i>A.calliptera</i> | 84 | RYSVSALRAPRC     | SYCC | RGSGAPHL        | NI      | AVRYDRL    | VILGMMMA | ALKNCGE         | 132 |
| <i>P.bivittatus</i> | 59 | QFP EEALKVAGEHFW | CCP  | -SSDSL          | AMAVRYN | RI         | HILVEILK | AIRNFPV         | 107 |

b

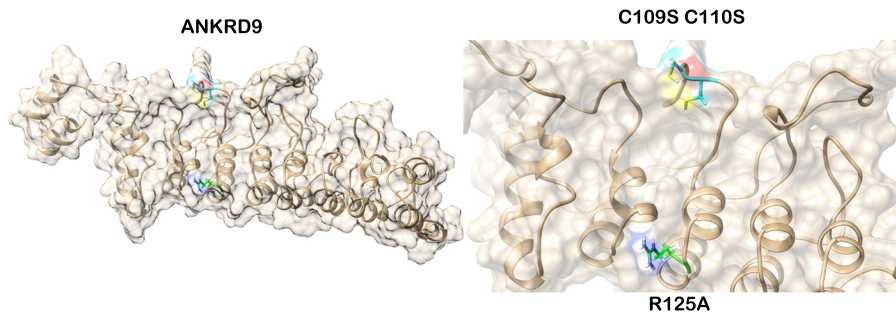

c

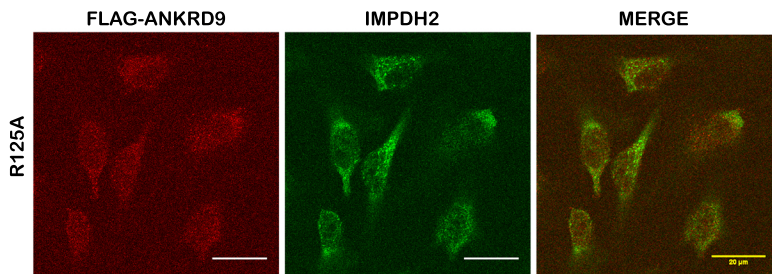

d

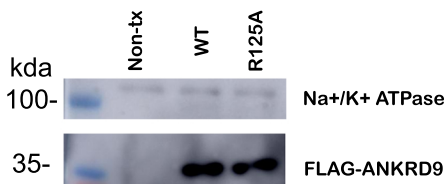

a

```

INFTA.A 1 -----TSTVYDDGLTAQQLFNGDGLTYNDFLLPGYIDFTADQVLTSLTKMIT 51
IMPDH2 1 -----TSTVYDDGLTAQQLFNGDGLTYNDFLLPGYIDFTADQVLTSLTKMIT 60

INFTA.A 52 LKTLPLVSPMDVTVEAGNAIAGLTGGIGFIHNCTPEFQAHEVRKVKYEQGITDPVV 111
IMPDH2 61 LKTLPLVSPMDVTVEAGNAIAGLTGGIGFIHNCTPEFQAHEVRKVKYEQGITDPVV 120

INFTA.A 112 LSPK-----GIISSRDIDFL---ENDCFLEEIMT 137
IMPDH2 121 LSPKRVKRVFEAKARSGFCGIFITDGRMGSLVGISSRDIDFLKEENDCFLEEIMT 180

INFTA.A 138 KREDLVVAFAGITLKEANEILQSKHGKLPVNEDEELVAI IART-LAKGRDYPLASKDA 196
IMPDH2 181 KREDLVVAFAGITLKEANEILQSKHGKLPVNEDEELVAI IARTLAKGRDYPLASKDA 240

INFTA.A 197 KQQLCGAAIGTHEDDKYRLDQLAQGVVVVLDSSQGHISFQIHNMIKYIKDKYPNLQVI 256
IMPDH2 241 KQQLCGAAIGTHEDDKYRLDQLAQGVVVVLDSSQGHISFQIHNMIKYIKDKYPNLQVI 300

INFTA.A 257 GGNVVTAAQAKNLI DAGVDAIKVHGMSGGICITQEVLAGCRFQATAVHKVSEYARRFVP 316
IMPDH2 301 GGNVVTAAQAKNLI DAGVDAIKVHGMSGGICITQEVLAGCRFQATAVHKVSEYARRFVP 360

INFTA.A 317 VIADGGIQNHIAKALALGASTVHGMSLLAAT EAPGEYFFSDGIRLKNYRGMGLDAM 376
IMPDH2 361 VIADGGIQNHIAKALALGASTVHGMSLLAAT EAPGEYFFSDGIRLKNYRGMGLDAM 420

INFTA.A 377 -----IKVAQGVSGAVQDNGSIIHKFPVYLIAGIQHSCQDIGAKSLTQVR 420
IMPDH2 421 DSKLSQNVFSEADHIKVAQGVSGAVQDNGSIIHKFPVYLIAGIQHSCQDIGAKSLTQVR 480

INFTA.A 421 AMMYSGLMKEKRTSSAQVEGGVHLSHYEKRLF 454
IMPDH2 481 AMMYSGLMKEKRTSSAQVEGGVHLSHYEKRLF 514

```

b

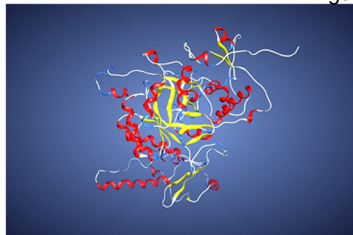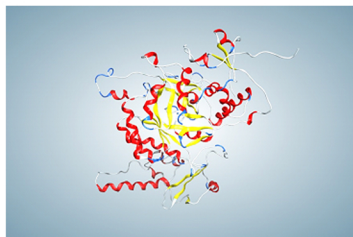

c

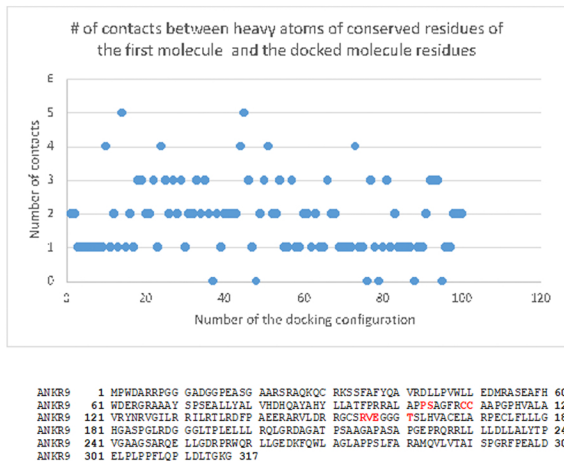

**a**    **IMPDH2 Regulatory Domain with GTP/GDP binding**

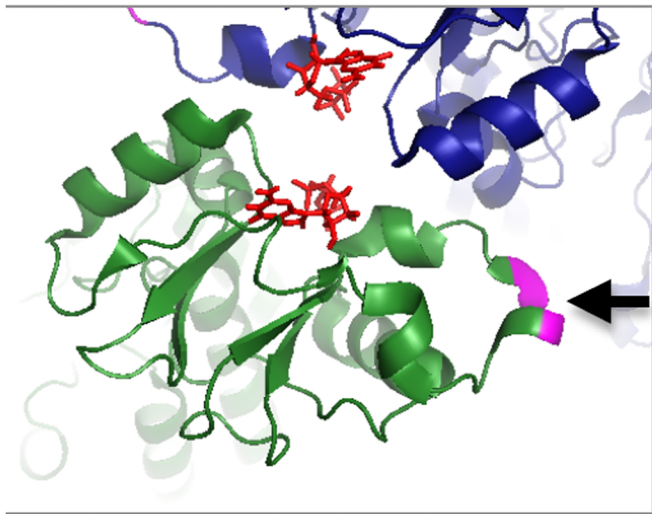

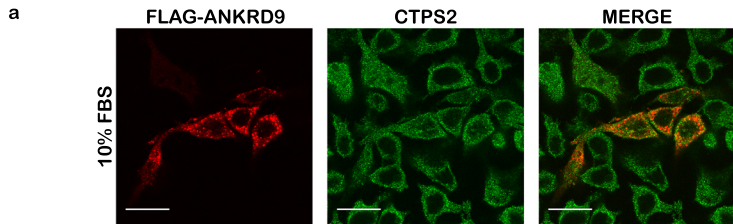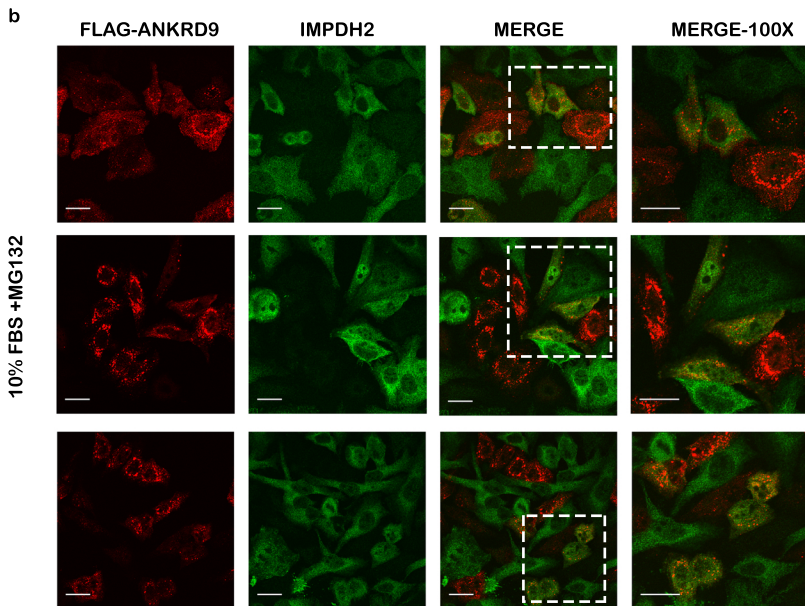

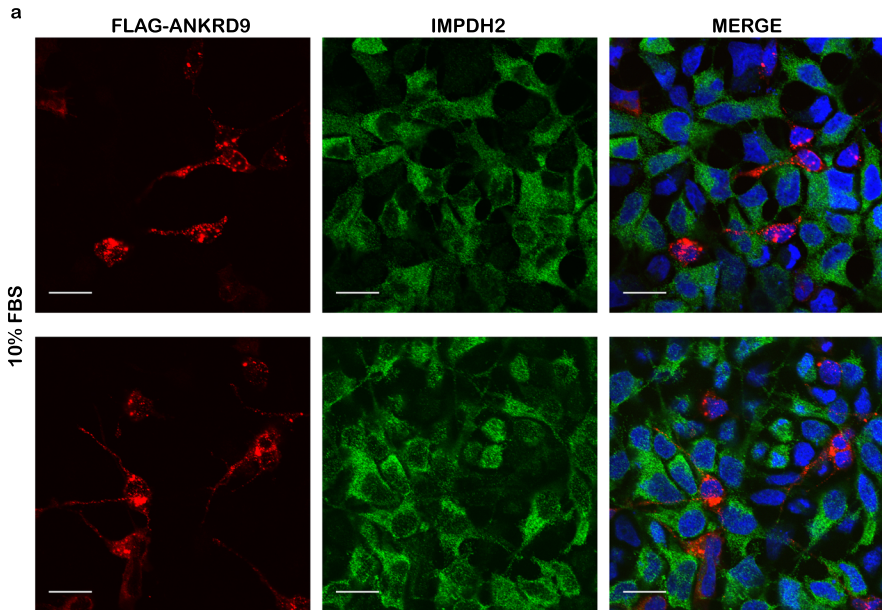

Supplement: supp_RA119.008231_144034_2_supp_365914_pv14k4.pdf [file supp_RA119.008231_144034_2_supp_365914_pv14k4.pdf]
